# Supplementary material for: Endogenous Gene Regulation as a Predicted Main Function of Type I-E CRISPR/Cas System in E. coli
Source: MDPI journal article supplement (doi:10.3390/molecules24040784), 2019-02-21
Supplement: s1 [file s1]

# Endogenous gene regulation as a predicted main function of Type I-E CRISPR/Cas system in *E. coli*

Bojan Đ. Božić, Jelena Repac, Marko Đorđević\*

*Institute of Physiology and Biochemistry, Faculty of Biology, University of Belgrade, Studentski trg 16, 11000  
Belgrade, Serbia*

\*Corresponding author. Tel.: +381 11 3033356; e-mail: dmarko@bio.bg.ac.rs

**Table S1.** List of *E. coli*-infecting dsDNA bacteriophages with accession numbers.

| <b>Bacteriophage</b>                         | <b>Accession number</b> |
|----------------------------------------------|-------------------------|
| Enterobacter phage CC31 [TAX:709484]         | NC_014662               |
| Enterobacteria phage 13a [TAX:532076]        | NC_011045               |
| Enterobacteria phage 2851 [TAX:254397]       | FM180578                |
| Enterobacteria phage 285P [TAX:669008]       | NC_015249               |
| Enterobacteria phage 933W [TAX:10730]        | NC_000924               |
| Enterobacteria phage 9g [TAX:1468411]        | NC_024146               |
| Enterobacteria phage BA14 [TAX:532074]       | NC_011040               |
| Enterobacteria phage BP-4795 [TAX:196242]    | NC_004813               |
| Enterobacteria phage Bp7 [TAX:1052121]       | NC_019500               |
| Enterobacteria phage cdtI [TAX:414970]       | NC_009514               |
| Enterobacteria phage CUS-3 [TAX:539221]      | CP000711                |
| Enterobacteria phage DE3 [TAX:482822]        | EU078592                |
| Enterobacteria phage DT571/2 [TAX:1567007]   | KM979355                |
| Enterobacteria phage EcoDS1 [TAX:532075]     | NC_011042               |
| Enterobacteria phage fiAA91-ss [TAX:1357825] | NC_022750               |
| Enterobacteria phage GEC-3S [TAX:1222338]    | NC_025425               |
| Enterobacteria phage HK106 [TAX:432198]      | NC_019768               |
| Enterobacteria phage HK140 [TAX:1147143]     | NC_019710               |
| Enterobacteria phage HK225 [TAX:1147144]     | NC_019717               |
| Enterobacteria phage HK446 [TAX:1147145]     | NC_019714               |
| Enterobacteria phage HK542 [TAX:432200]      | NC_019769               |
| Enterobacteria phage HK544 [TAX:432201]      | NC_019767               |
| Enterobacteria phage HK629 [TAX:1147148]     | NC_019711               |
| Enterobacteria phage HK630 [TAX:1147146]     | NC_019723               |
| Enterobacteria phage HK633 [TAX:1147147]     | NC_019719               |
| Enterobacteria phage IME08 [TAX:697227]      | NC_014260               |
| Enterobacteria phage IME10 [TAX:1090133]     | NC_019501               |
| Enterobacteria phage J8-65 [TAX:1536597]     | NC_025445               |
| Enterobacteria phage JenK1 [TAX:1610836]     | NC_029021               |

|                                                    |           |
|----------------------------------------------------|-----------|
| Enterobacteria phage JenP1 [TAX:1610837]           | NC_029028 |
| Enterobacteria phage JenP2 [TAX:1610838]           | NC_028997 |
| Enterobacteria phage JS10 [TAX:576790]             | NC_012741 |
| Enterobacteria phage K1F [TAX:344021]              | NC_007456 |
| Enterobacteria phage mEp043 c-1 [TAX:1147149]      | NC_019706 |
| Enterobacteria phage mEp235 [TAX:1147150]          | NC_019708 |
| Enterobacteria phage mEp237 [TAX:1147151]          | NC_019704 |
| Enterobacteria phage mEp460 [TAX:1147152]          | NC_019716 |
| Enterobacteria phage mEpX1 [TAX:1147153]           | NC_019709 |
| Enterobacteria phage mEpX2 [TAX:1147154]           | NC_019705 |
| Enterobacteria phage P7 [TAX:10682]                | AF503408  |
| Enterobacteria phage P88 [TAX:1567486]             | NC_026014 |
| Enterobacteria phage Phi1 [TAX:448384]             | NC_009821 |
| Enterobacteria phage phi80 [TAX:10713]             | NC_021190 |
| Enterobacteria phage phi92 [TAX:948870]            | NC_023693 |
| Enterobacteria phage phiEcoM-GJ1 [TAX:451705]      | NC_010106 |
| Enterobacteria phage phiJLA23 [TAX:1273706]        | KC333879  |
| Enterobacteria phage phiP27 [TAX:103807]           | NC_003356 |
| Enterobacteria phage RB10 [TAX:69608]              | KM606999  |
| Enterobacteria phage RB27 [TAX:69609]              | NC_025448 |
| Enterobacteria phage RB33 [TAX:134822]             | KM607001  |
| Enterobacteria phage RB49 [TAX:50948]              | NC_005066 |
| Enterobacteria phage RB5 [TAX:1112578]             | KM606995  |
| Enterobacteria phage RB51 [TAX:10693]              | NC_012635 |
| Enterobacteria phage RB55 [TAX:697289]             | KM607002  |
| Enterobacteria phage RB59 [TAX:697290]             | KM607003  |
| Enterobacteria phage RB6 [TAX:69610]               | KM606996  |
| Enterobacteria phage RB68 [TAX:36339]              | NC_027979 |
| Enterobacteria phage RB69 [TAX:12353]              | NC_004928 |
| Enterobacteria phage RB7 [TAX:697291]              | KM606997  |
| Enterobacteria phage RB9 [TAX:69612]               | KM606998  |
| Enterobacteria phage T3 [TAX:10759]                | NC_003298 |
| Enterobacteria phage T4T [TAX:857277]              | HM137666  |
| Enterobacteria phage T7 [TAX:10760]                | NC_001604 |
| Enterobacteria phage T7M [TAX:1075774]             | JX421753  |
| Enterobacteria phage vB_EcoM_VR5 [TAX:1567026]     | NC_028881 |
| Enterobacteria phage vB_EcoP_ACG-C91 [TAX:1141139] | NC_019403 |
| Enterobacteria phage vB_EcoS_NBD2 [TAX:1852563]    | NC_031050 |
| Enterobacteria phage vB_EcoS_Rogue1 [TAX:1147155]  | NC_019718 |
| Enterobacteria phage VT2-Sakai [TAX:97081]         | NC_000902 |

|                                                     |           |
|-----------------------------------------------------|-----------|
| Enterobacteria phage VT2phi_272 [TAX:936054]        | NC_028656 |
| Enterobacterial phage mEp213 [TAX:1147156]          | NC_019720 |
| Enterobacterial phage mEp234 [TAX:1147157]          | NC_019715 |
| Enterobacterial phage mEp390 [TAX:1147158]          | NC_019721 |
| Escherichia coli O157 typing phage 1 [TAX:1508671]  | KP869100  |
| Escherichia coli O157 typing phage 10 [TAX:1508672] | KP869108  |
| Escherichia coli O157 typing phage 11 [TAX:1508673] | KP869109  |
| Escherichia coli O157 typing phage 12 [TAX:1508674] | KP869110  |
| Escherichia coli O157 typing phage 3 [TAX:1508678]  | KP869101  |
| Escherichia coli O157 typing phage 5 [TAX:1508680]  | KP869103  |
| Escherichia coli O157 typing phage 6 [TAX:1508681]  | KP869104  |
| Escherichia phage 121Q [TAX:1555202]                | NC_025447 |
| Escherichia phage 172-1 [TAX:1598146]               | NC_028903 |
| Escherichia phage 1720a-02 [TAX:1115653]            | KF030445  |
| Escherichia phage 4MG [TAX:1391428]                 | NC_022968 |
| Escherichia phage 64795_ec1 [TAX:1837842]           | NC_031114 |
| Escherichia phage ADB-2 [TAX:1216926]               | NC_019725 |
| Escherichia phage APCEc01 [TAX:1655305]             | NC_029091 |
| Escherichia phage AR1 [TAX:66711]                   | NC_027983 |
| Escherichia phage Av-05 [TAX:1527519]               | NC_025830 |
| Escherichia phage Bp4 [TAX:1458848]                 | NC_024142 |
| Escherichia phage bV_EcoS_AHP24 [TAX:1416027]       | KF771236  |
| Escherichia phage CAjan [TAX:1610828]               | NC_028776 |
| Escherichia phage CICC 80001 [TAX:1527506]          | NC_027387 |
| Escherichia phage D108 [TAX:665033]                 | NC_013594 |
| Escherichia phage e4/1c [TAX:1495286]               | NC_024210 |
| Escherichia phage EB49 [TAX:1048207]                | NC_023743 |
| Escherichia phage EC1-UPM [TAX:1258572]             | KC206276  |
| Escherichia phage EC6 [TAX:1229757]                 | NC_027369 |
| Escherichia phage ECBP1 [TAX:1604356]               | NC_018854 |
| Escherichia phage ECBP2 [TAX:1604355]               | NC_018859 |
| Escherichia phage ECBP5 [TAX:1498172]               | NC_027330 |
| Escherichia phage ECML-117 [TAX:1204521]            | NC_025441 |
| Escherichia phage ECML-134 [TAX:1204522]            | NC_025449 |
| Escherichia phage ECML-4 [TAX:1204523]              | NC_025446 |
| Escherichia phage EK99P-1 [TAX:1527514]             | NC_024783 |
| Escherichia phage Envy [TAX:1883200]                | NC_031081 |
| Escherichia phage FFH2 [TAX:1446490]                | NC_024134 |
| Escherichia phage FV3 [TAX:1131317]                 | NC_019517 |
| Escherichia phage Gluttony [TAX:1883202]            | NC_031113 |

|                                          |           |
|------------------------------------------|-----------|
| Escherichia phage HK578 [TAX:1147142]    | NC_019724 |
| Escherichia phage HK639 [TAX:906669]     | NC_016158 |
| Escherichia phage HK75 [TAX:906668]      | NC_016160 |
| Escherichia phage HX01 [TAX:1237364]     | NC_018855 |
| Escherichia phage HY01 [TAX:1434323]     | NC_027349 |
| Escherichia phage HY02 [TAX:1527531]     | NC_028872 |
| Escherichia phage HY03 [TAX:1654926]     | NC_031047 |
| Escherichia phage ime09 [TAX:1054834]    | NC_019503 |
| Escherichia phage IME11 [TAX:1239384]    | NC_019423 |
| Escherichia phage JES2013 [TAX:1327956]  | NC_022323 |
| Escherichia phage JH2 [TAX:1340750]      | NC_029023 |
| Escherichia phage JS98 [TAX:293178]      | NC_010105 |
| Escherichia phage JSE [TAX:576789]       | NC_012740 |
| Escherichia phage K1-ind(2) [TAX:698489] | GU196280  |
| Escherichia phage K1-ind(3) [TAX:698490] | GU196281  |
| Escherichia phage K1ind1 [TAX:698488]    | GU196279  |
| Escherichia phage KBNP1711 [TAX:1436889] | NC_023593 |
| Escherichia phage LM33_P1 [TAX:1788294]  | NC_031937 |
| Escherichia phage Lw1 [TAX:1307804]      | NC_021344 |
| Escherichia phage Min27 [TAX:489779]     | NC_010237 |
| Escherichia phage MX01 [TAX:1837930]     | NC_031934 |
| Escherichia phage NJ01 [TAX:1237159]     | NC_018835 |
| Escherichia phage P13374 [TAX:1150869]   | NC_018846 |
| Escherichia phage P483 [TAX:1572753]     | NC_028822 |
| Escherichia phage P694 [TAX:1572754]     | NC_028863 |
| Escherichia phage PA2 [TAX:1660365]      | NC_028449 |
| Escherichia phage PBECO 4 [TAX:1273738]  | NC_027364 |
| Escherichia phage PE3-1 [TAX:1498170]    | NC_024379 |
| Escherichia phage phAPEC8 [TAX:1229753]  | NC_020079 |
| Escherichia phage PhaxI [TAX:926589]     | NC_019452 |
| Escherichia phage phi191 [TAX:1458706]   | NC_028660 |
| Escherichia phage phiV10 [TAX:343516]    | NC_007804 |
| Escherichia phage Pollock [TAX:1540097]  | NC_027381 |
| Escherichia phage pro147 [TAX:1649239]   | NC_028896 |
| Escherichia phage pro483 [TAX:1649240]   | NC_028943 |
| Escherichia phage RB3 [TAX:31533]        | NC_025419 |
| Escherichia phage Seurat [TAX:1540098]   | NC_027378 |
| Escherichia phage slur01 [TAX:1720493]   | NC_028831 |
| Escherichia phage slur02 [TAX:1720494]   | NC_028927 |
| Escherichia phage slur05 [TAX:1720498]   | NC_028901 |

|                                                                      |           |
|----------------------------------------------------------------------|-----------|
| Escherichia phage slur14 [TAX:1720504]                               | NC_028448 |
| Escherichia phage slur16 [TAX:1720495]                               | NC_028248 |
| Escherichia phage Stx2 II [TAX:194949]                               | NC_004914 |
| Escherichia phage SUSP1 [TAX:1718606]                                | NC_028808 |
| Escherichia phage SUSP2 [TAX:1718669]                                | NC_028935 |
| Escherichia phage TL-2011b [TAX:1124654]                             | NC_019445 |
| Escherichia phage TL-2011c [TAX:1124655]                             | NC_019442 |
| Escherichia phage UFV-AREG1 [TAX:1837867]                            | NC_031030 |
| Escherichia phage rV5 [TAX:399183]                                   | NC_011041 |
| Escherichia phage vB_EcoM-ep3 [TAX:1541883]                          | NC_025430 |
| Escherichia phage vB_EcoM-UFV13 [TAX:1815590]                        | NC_031103 |
| Escherichia phage vB_EcoM-VpaE1 [TAX:1555238]                        | NC_027337 |
| Escherichia phage vB_EcoM_ACG-C40 [TAX:1141141]                      | NC_019399 |
| Escherichia phage vB_EcoM_Alf5 [TAX:1873990]                         | NC_031082 |
| Escherichia phage vB_EcoM_AYO145A [TAX:1636202]                      | NC_028825 |
| Escherichia phage vB_EcoM_ECO1230-10 [TAX:669875]                    | NC_027995 |
| Escherichia phage vB_EcoM_JS09 [TAX:1430444]                         | NC_024124 |
| Escherichia phage vB_EcoM_PhAPEC2 [TAX:1391224]                      | NC_024794 |
| Escherichia phage vB_EcoM_VR20 [TAX:1567027]                         | NC_028894 |
| Escherichia phage vB_EcoM_VR25 [TAX:1567028]                         | NC_028925 |
| Escherichia phage vB_EcoM_VR26 [TAX:1567029]                         | NC_028957 |
| Escherichia phage vB_EcoM_VR7 [TAX:700939]                           | NC_014792 |
| Escherichia phage vB_EcoP_24B [TAX:866553]                           | NC_027984 |
| Escherichia phage vB_EcoP_G7C [TAX:1054461]                          | NC_015933 |
| Escherichia phage vB_EcoP_GA2A [TAX:1755695]                         | NC_031943 |
| Escherichia phage vB_EcoP_PhAPEC5 [TAX:1395983]                      | NC_024786 |
| Escherichia phage vB_EcoP_PhAPEC7 [TAX:1391223]                      | NC_024790 |
| Escherichia phage vB_EcoP_SU10 [TAX:1519788]                         | NC_027395 |
| Escherichia phage vB_EcoS_AHP42 [TAX:1416028]                        | NC_024793 |
| Escherichia phage vB_EcoS_AHS24 [TAX:1416030]                        | NC_024784 |
| Escherichia phage vB_EcoS_AKS96 [TAX:1416031]                        | NC_024789 |
| Escherichia phage vB_EcoS_FFH1 [TAX:1446489]                         | NC_024139 |
| Escherichia phage vB_Eco_ACG-M12 [TAX:1141140]                       | NC_019404 |
| Escherichia phage WG01 [TAX:1837931]                                 | NC_031928 |
| Escherichia phage wV7 [TAX:1054480]                                  | NC_019505 |
| Escherichia phage wV8 [TAX:576791]                                   | NC_012749 |
| Escherichia phage YD-2008.s [TAX:1567004]                            | NC_027383 |
| Escherichia Stx1 converting phage [TAX:194948]                       | NC_004913 |
| Escherichia Stx1-converting recombinant phage HUN/2013 [TAX:1506453] | KJ909655  |
| Escherichia virus 186 [TAX:29252]                                    | NC_001317 |

|                                                |           |
|------------------------------------------------|-----------|
| Escherichia virus AKFV33 [TAX:1112008]         | NC_017969 |
| Escherichia virus CBA120 [TAX:1987159]         | NC_016570 |
| Escherichia virus DT57C [TAX:1567006]          | NC_027356 |
| Escherichia virus EPS7 [TAX:491003]            | NC_010583 |
| Escherichia virus HK022 [TAX:10742]            | NC_002166 |
| Escherichia virus HK97 [TAX:37554]             | NC_002167 |
| Escherichia virus JL1 [TAX:1245890]            | NC_019419 |
| Escherichia virus K1-5 [TAX:187764]            | NC_008152 |
| Escherichia virus K1E [TAX:344022]             | NC_007637 |
| Escherichia virus JK06 [TAX:1920999]           | NC_007291 |
| Escherichia virus Lambda [TAX:10710]           | NC_001416 |
| Escherichia virus Mu [TAX:10677]               | NC_000929 |
| Escherichia virus N15 [TAX:40631]              | NC_001901 |
| Escherichia virus N4 [TAX:10752]               | NC_008720 |
| Escherichia virus P1 [TAX:10678]               | NC_005856 |
| Escherichia virus P2 [TAX:10679]               | NC_001895 |
| Escherichia virus phiEco32 [TAX:490103]        | NC_010324 |
| Escherichia virus RB16 [TAX:329381]            | NC_014467 |
| Escherichia virus RB32 [TAX:45406]             | NC_008515 |
| Escherichia virus Rtp [TAX:355246]             | NC_007603 |
| Escherichia virus SSL2009a [TAX:624134]        | NC_012223 |
| Escherichia virus T1 [TAX:1921008]             | NC_005833 |
| Escherichia virus T4 [TAX:10665]               | NC_000866 |
| Escherichia virus T5 [TAX:10726]               | NC_005859 |
| Escherichia virus TLS [TAX:245685]             | NC_009540 |
| Escherichia virus Wphi [TAX:103216]            | NC_005056 |
| Salmonella phage SFP10 [TAX:1080800]           | NC_016073 |
| Salmonella virus HK620 [TAX:155148]            | NC_002730 |
| Salmonella virus PRD1 [TAX:10658]              | NC_001421 |
| Salmonella virus SPC35 [TAX:977927]            | NC_015269 |
| Stx2 converting phage I [TAX:180816]           | AP004402  |
| Stx2-converting phage 1717 [TAX:563769]        | NC_011357 |
| Stx2-converting phage 86 [TAX:379329]          | NC_008464 |
| Escherichia phage phiKT                        | NC_019520 |
| Escherichia phage slur07                       | NC_028780 |
| Escherichia phage K1G                          | NC_027993 |
| Escherichia phage K1H                          | NC_027994 |
| Enterobacteria phage K30                       | NC_015719 |
| Enterobacteria phage QL01                      | NC_028847 |
| Escherichia phage slur09 genome assembly slu09 | NC_028840 |

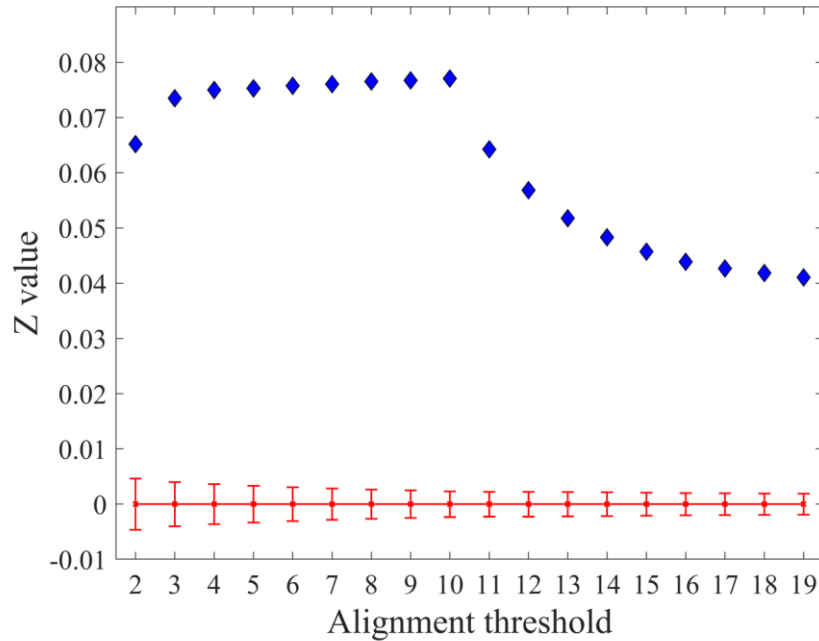

**Figure S1.** Z value expressed as a function of the number of alignments; Z value corresponds to the difference between the mean SAS value of the *E. coli* hits vs. randomized *E. coli* hits divided by the mean SAS value of the randomized *E. coli* hits (shown on the Figure as blue diamond); Red vertical bars correspond to the confidence bound estimates of the analogously defined Z value for the randomized background. Note that the Z values for *E. coli* hits are significantly higher compared to the randomized background, over the entire threshold range.

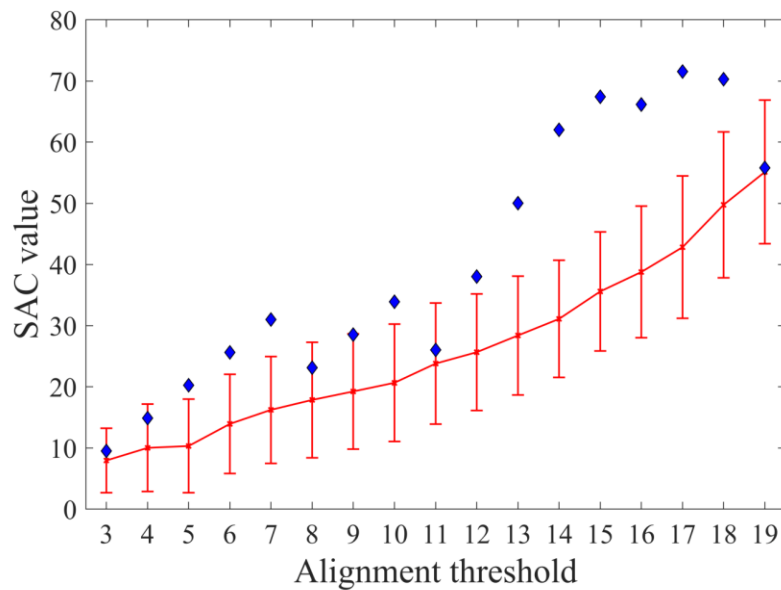

**Figure S2.** SAC value expressed as a function of the number of alignments; SAC value (shown as a blue diamond) here corresponds to the difference between the SAC value of coding regions and weighted SAC value of intergenic regions. The weighting coefficient is obtained by dividing the full length of coding regions by the full length of intergenic regions of the *E. coli* genome ( $w = 5.6235$ ); Red vertical bars correspond to the confidence bound estimates of the analogously defined SAC value for the randomized background.
